# Supplementary material
Source: PubMed Central journal article supplement (PMC6812596)
Supplement: NIHMS1045342-supplement-Supplement.pdf [file NIHMS1045342-supplement-Supplement.pdf]

**SUPPLEMENTARY MATERIAL TO ACCOMPANY:**

**ION MOBILITY SPECTROMETRY AND TANDEM MASS SPECTROMETRY ANALYSIS OF  
ESTRADIOL GLUCURONIDE ISOMERS**

---

***Alana L. Rister<sup>1</sup> and Eric D. Dodds<sup>1,2\*</sup>***

<sup>1</sup>Department of Chemistry and

<sup>2</sup>Nebraska Center for Integrated Biomolecular Communication

University of Nebraska – Lincoln

Lincoln, NE, 68588-0304, USA

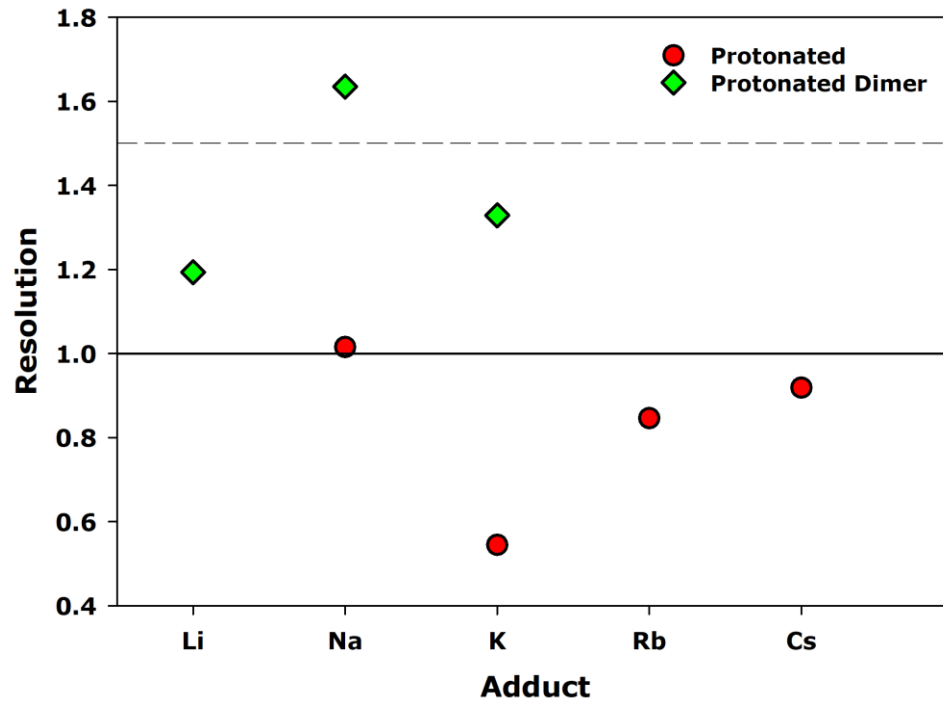

**Figure S1.** Scatter plot of the resolution values of standards of the neutral estradiol glucuronide with alkali adducts (red circle) and the dimeric neutral estradiol glucuronide with alkali adducts (green diamond).

**Table S1.** Material sources for chemicals used in this study.

| <b>Material</b>                 | <b>Source</b>     | <b>Location</b> |
|---------------------------------|-------------------|-----------------|
| <b>Polyalanine</b>              | Sigma-Aldrich     | St. Louis, MO   |
| <b>Estradiol-3-Glucuronide</b>  | Cayman Chemical   | Ann Arbor, MI   |
| <b>Estradiol-17-Glucuronide</b> | Cayman Chemical   | Ann Arbor, MI   |
| <b>HPLC Grade Water</b>         | Sigma-Aldrich     | St. Louis, MO   |
| <b>Methanol</b>                 | Fisher Scientific | Pittsburg, PA   |
| <b>Acetonitrile</b>             | Fisher Scientific | Pittsburg, PA   |

**Table S2.** Resolution values for standards of the neutral estradiol glucuronide with alkali adducts ( $[M+H+X]^+$ ) and the dimeric neutral estradiol glucuronide with alkali adducts ( $[2M+2H+X]^+$ ). N.D. represents not detected.

| <b>X</b>  | <b>[M+H+X]<sup>+</sup></b> | <b>[2M+2H+X]<sup>+</sup></b> |
|-----------|----------------------------|------------------------------|
| <b>Li</b> | N.D.                       | 1.19                         |
| <b>Na</b> | 1.02                       | 1.64                         |
| <b>K</b>  | 0.54                       | 1.33                         |
| <b>Rb</b> | 0.85                       | N.D.                         |
| <b>Cs</b> | 0.92                       | N.D.                         |

**Table S3.** Collision cross sections, standard deviation ( $n = 4$ ), error, and resolution of the sodiated dimer of the estradiol glucuronide isomers as standards and in a mixture.

| <b>Species</b> | <b>Standard<br/>CCS (<math>\text{\AA}^2</math>)</b> | <b>Mixture CCS<br/>(<math>\text{\AA}^2</math>)</b> | <b>%<br/>Error</b> | <b>Resolution</b> |
|----------------|-----------------------------------------------------|----------------------------------------------------|--------------------|-------------------|
| <b>E3G</b>     | $302.5 \pm 3.4$                                     | $306.7 \pm 2.6$                                    | 1.38               | 1.23              |
| <b>E17G</b>    | $310.5 \pm 1.9$                                     | $315.6 \pm 2.8$                                    | 1.64               |                   |

**Table S4.** Collision cross sections ( $\Omega$ ) and standard deviation ( $n = 4$ ) of metal adducts of estradiol-3-glucuronide (E3G) and estradiol-17-glucuronide (E17G).

| Adduct                 | E3G                            |                       | E17G                           |                       |
|------------------------|--------------------------------|-----------------------|--------------------------------|-----------------------|
|                        | $\Omega$<br>( $\text{\AA}^2$ ) | Standard<br>Deviation | $\Omega$<br>( $\text{\AA}^2$ ) | Standard<br>Deviation |
| [M+Li] <sup>+</sup>    | 212.3                          | 0.89                  | 214.0                          | 1.06                  |
| [M+Na] <sup>+</sup>    | 216.8                          | 0.92                  | 223.2                          | 1.02                  |
| [M+K] <sup>+</sup>     | 220.5                          | 1.18                  | 224.9                          | 0.93                  |
| [M+Rb] <sup>+</sup>    | 221.0                          | 1.03                  | 225.0                          | 1.03                  |
| [M+Cs] <sup>+</sup>    | 225.7                          | 1.98                  | 227.0                          | 1.03                  |
| [M-H+2Na] <sup>+</sup> | 230.4                          | 1.04                  | 234.8                          | 1.11                  |
| [M-H+2K] <sup>+</sup>  | 233.8                          | 2.48                  | 231.4                          | 2.04                  |
| [M-H+2Rb] <sup>+</sup> | 254.1                          | 1.21                  | 254.8                          | 1.26                  |
| [M-H+2Cs] <sup>+</sup> | 281.5                          | 1.57                  | 281.6                          | 1.51                  |
| [2M+H+Li] <sup>+</sup> | 305.8                          | 1.54                  | 311.3                          | 1.37                  |
| [2M+H+Na] <sup>+</sup> | 302.5                          | 1.72                  | 310.5                          | 0.93                  |
| [2M+H+K] <sup>+</sup>  | 303.1                          | 1.84                  | 312.6                          | 0.41                  |

**Table S5.** Fraction of  $m/z$  271 and standard deviation ( $n = 4$ ) of metal adducts of E3G andE17G, where  $\text{Abundance}_{271} = \sum \frac{PA_{271}}{PA_{271} + PA_{447}}$ .

| Collision Energy (V) | E3G                          |                    | E17G                         |                    |
|----------------------|------------------------------|--------------------|------------------------------|--------------------|
|                      | Abundance <sub>271</sub> (%) | Standard Deviation | Abundance <sub>271</sub> (%) | Standard Deviation |
| <b>0</b>             | 0.02                         | 0.007              | 0.01                         | 0.002              |
| <b>5</b>             | 0.02                         | 0.003              | 0.00                         | 0.001              |
| <b>10</b>            | 0.03                         | 0.004              | 0.01                         | 0.003              |
| <b>15</b>            | 0.17                         | 0.016              | 0.06                         | 0.008              |
| <b>20</b>            | 0.81                         | 0.050              | 0.26                         | 0.024              |
| <b>25</b>            | 2.64                         | 0.038              | 0.68                         | 0.033              |
| <b>30</b>            | 11.42                        | 0.177              | 2.21                         | 0.064              |
| <b>35</b>            | 54.42                        | 0.448              | 9.89                         | 0.355              |
| <b>40</b>            | 92.68                        | 0.191              | 33.56                        | 0.559              |
| <b>45</b>            | 98.78                        | 0.107              | 65.77                        | 0.609              |
